# Supplementary material for: PI3K/AKT/mTOR pathway activation in primary and corresponding metastatic breast tumors after adjuvant endocrine therapy
Source: PubMed Central journal article supplement — Int J Cancer. 2014 Feb 27;135(5):1257–63. doi: 10.1002/ijc.28769 (PMC4277331; doi:10.1002/ijc.28769), 2014-02-27

### Supplementary Table 1

Antibodies and standardized protocols on the Ventana Benchmark<sup>®</sup> Ultra system

| Protein name           | Clone | Company        | Titer  | Art. No. | antigen retrieval | primary |
|------------------------|-------|----------------|--------|----------|-------------------|---------|
| mTOR (phospho Ser2448) | 49F9  | Cell signaling | 1/300  | 2976     | 36 min Cc1        | 1h      |
| 4EBP1 (phoshpo Ser65)  | 174A9 | Cell signaling | 1/1000 | 9456     | 36 min Cc1        | 1h      |
| S6K1 (phospho Thr389)  | 1A5   | Cell signaling | 1/300  | 9206     | 36 min Cc1        | 32 min  |

**Supplementary table 2:** Multivariate linear regression model for the difference in p-mTOR expression between metastatic and primary tumor tissue

|                              |                          | 95% Confidence Interval for Beta |         |             |             |
|------------------------------|--------------------------|----------------------------------|---------|-------------|-------------|
|                              |                          | Beta                             | p-value | Lower Bound | Upper Bound |
| (Constant)                   |                          | -25.60                           | 0.29    | -73.47      | 22.28       |
| <b>age</b>                   | < 55 versus ≥ 55 year    | -5.54                            | 0.72    | -36.40      | 25.32       |
| <b>location</b>              | non-skin versus skin     | -3.80                            | 0.76    | -29.03      | 21.42       |
| <b>grade</b>                 | grade 3 versus grade 1-2 | 15.77                            | 0.19    | -8.27       | 39.81       |
| <b>T-stage</b>               | T3-4 versus T1-2         | 7.92                             | 0.69    | -31.00      | 46.83       |
| <b>lymph node status</b>     | positive versus negative | -10.78                           | 0.57    | -48.63      | 27.06       |
| <b>HER2 status</b>           | positive versus negative | 3.28                             | 0.88    | -38.68      | 45.24       |
| <b>progesterone receptor</b> | positive versus negative | 44.78                            | 0.02    | 7.37        | 82.20       |
| <b>endocrine therapy</b>     | treated versus untreated | 39.41                            | 0.01    | 9.11        | 69.70       |
| <b>chemotherapy</b>          | treated versus untreated | -17.67                           | 0.32    | -52.63      | 17.29       |

-

**Supplementary table 3:** Multivariate linear regression model for the difference in p-4EBP1 expression between metastatic and primary tumor tissue

|                              |                          | 95% Confidence Interval for Beta |         |             |             |
|------------------------------|--------------------------|----------------------------------|---------|-------------|-------------|
|                              |                          | Beta                             | p-value | Lower Bound | Upper Bound |
| (Constant)                   |                          | 3.93                             | 0.85    | -36.06      | 43.93       |
| <b>age</b>                   | < 55 versus ≥ 55 year    | -9.63                            | 0.46    | -35.56      | 16.30       |
| <b>location</b>              | non-skin versus skin     | -11.11                           | 0.30    | -32.42      | 10.21       |
| <b>grade</b>                 | grade 3 versus grade 1-2 | 21.76                            | 0.04    | 1.01        | 42.51       |
| <b>T-stage</b>               | T3-4 versus T1-2         | 12.42                            | 0.45    | -20.21      | 45.04       |
| <b>lymph node status</b>     | positive versus negative | -7.76                            | 0.64    | -40.82      | 25.29       |
| <b>HER2 status</b>           | positive versus negative | 9.18                             | 0.63    | -28.21      | 46.56       |
| <b>progesterone receptor</b> | positive versus negative | 4.50                             | 0.77    | -26.56      | 35.55       |
| <b>endocrine therapy</b>     | treated versus untreated | 29.16                            | 0.03    | 3.39        | 54.93       |
| <b>chemotherapy</b>          | treated versus untreated | -11.04                           | 0.48    | -41.96      | 19.89       |

**Supplementary table 4:** Multivariate linear regression model for the difference in p-p70S6K expression between metastatic and primary tumor tissue

|                              |                          | 95% Confidence Interval for Beta |         |             |             |
|------------------------------|--------------------------|----------------------------------|---------|-------------|-------------|
|                              |                          | Beta                             | p-value | Lower Bound | Upper Bound |
| (Constant)                   |                          | 0.05                             | 0.87    | -0.59       | 0.69        |
| <b>age</b>                   | < 55 versus ≥ 55 year    | -0.34                            | 0.11    | -0.75       | 0.08        |
| <b>location</b>              | non-skin versus skin     | -0.30                            | 0.08    | -0.63       | 0.04        |
| <b>grade</b>                 | grade 3 versus grade 1-2 | 0.10                             | 0.55    | -0.23       | 0.42        |
| <b>T-stage</b>               | T3-4 versus T1-2         | 0.25                             | 0.33    | -0.26       | 0.76        |
| <b>lymph node status</b>     | positive versus negative | -0.41                            | 0.11    | -0.92       | 0.10        |
| <b>HER2 status</b>           | positive versus negative | 0.50                             | 0.10    | -0.10       | 1.09        |
| <b>progesterone receptor</b> | positive versus negative | 0.25                             | 0.31    | -0.24       | 0.75        |
| <b>endocrine therapy</b>     | treated versus untreated | 0.74                             | 0.001   | 0.34        | 1.14        |
| <b>chemotherapy</b>          | treated versus untreated | 0.05                             | 0.84    | -0.42       | 0.52        |

**Supplementary table 5:** Multivariate linear regression model for the difference in p-4EBP1 expression between metastatic and primary tumor tissue in patients who did not receive chemotherapy.

|                              |                          | 95% Confidence Interval for Beta |         |             |             |
|------------------------------|--------------------------|----------------------------------|---------|-------------|-------------|
|                              |                          | Beta                             | p-value | Lower Bound | Upper Bound |
| (Constant)                   |                          | 13.33                            | 0.60    | -37.91      | 64.57       |
| <b>age</b>                   | < 55 versus ≥ 55 year    | 1.33                             | 0.94    | -31.84      | 34.49       |
| <b>location</b>              | non-skin versus skin     | -16.63                           | 0.22    | -43.43      | 10.16       |
| <b>grade</b>                 | grade 3 versus grade 1-2 | 13.86                            | 0.33    | -14.43      | 42.15       |
| <b>T-stage</b>               | T3-4 versus T1-2         | 40.51                            | 0.05    | 0.24        | 80.78       |
| <b>lymph node status</b>     | positive versus negative | -12.53                           | 0.57    | -57.44      | 32.39       |
| <b>HER2 status</b>           | positive versus negative | -3.55                            | 0.91    | -66.74      | 59.63       |
| <b>progesterone receptor</b> | positive versus negative | -3.95                            | 0.84    | -42.42      | 34.52       |
| <b>endocrine therapy</b>     | treated versus untreated | 20.21                            | 0.38    | -26.31      | 66.72       |

**Supplementary table 6:** Multivariate linear regression model for the difference in p-p70S6K expression between metastatic and primary tumor tissue in patients who did not receive chemotherapy.

|                              |                          | 95% Confidence Interval for Beta |         |             |             |
|------------------------------|--------------------------|----------------------------------|---------|-------------|-------------|
|                              |                          | Beta                             | p-value | Lower Bound | Upper Bound |
| (Constant)                   |                          | 0.10                             | 0.79    | -0.62       | 0.81        |
| <b>age</b>                   | < 55 versus ≥ 55 year    | 0.06                             | 0.81    | -0.42       | 0.53        |
| <b>location</b>              | non-skin versus skin     | -0.35                            | 0.06    | -0.72       | 0.02        |
| <b>grade</b>                 | grade 3 versus grade 1-2 | -0.12                            | 0.53    | -0.52       | 0.28        |
| <b>T-stage</b>               | T3-4 versus T1-2         | 0.19                             | 0.49    | -0.36       | 0.73        |
| <b>lymph node status</b>     | positive versus negative | -0.31                            | 0.29    | -0.88       | 0.27        |
| <b>HER2 status</b>           | positive versus negative | -0.04                            | 0.93    | -0.91       | 0.83        |
| <b>progesterone receptor</b> | positive versus negative | 0.21                             | 0.44    | -0.33       | 0.74        |
| <b>endocrine therapy</b>     | treated versus untreated | 0.50                             | 0.12    | -0.13       | 1.13        |

**Supplementary table 7:** Multivariate linear regression model for the difference in p-mTOR expression between metastatic and primary tumor tissue in patients who did not receive chemotherapy.

|                              |                          | 95% Confidence Interval for Beta |         |             |             |
|------------------------------|--------------------------|----------------------------------|---------|-------------|-------------|
|                              |                          | Beta                             | p-value | Lower Bound | Upper Bound |
| (Constant)                   |                          | -34.59                           | 0.23    | -92.45      | 23.28       |
| <b>age</b>                   | < 55 versus ≥ 55 year    | -20.39                           | 0.28    | -58.36      | 17.58       |
| <b>location</b>              | non-skin versus skin     | -7.61                            | 0.61    | -37.60      | 22.38       |
| <b>grade</b>                 | grade 3 versus grade 1-2 | 32.97                            | 0.05    | 0.78        | 65.15       |
| <b>T-stage</b>               | T3-4 versus T1-2         | 16.99                            | 0.45    | -28.07      | 62.04       |
| <b>lymph node status</b>     | positive versus negative | -36.73                           | 0.13    | -84.24      | 10.78       |
| <b>HER2 status</b>           | positive versus negative | -19.25                           | 0.52    | -79.62      | 41.13       |
| <b>progesterone receptor</b> | positive versus negative | 52.27                            | 0.02    | 8.67        | 95.88       |
| <b>endocrine therapy</b>     | treated versus untreated | 75.21                            | 0.005   | 24.04       | 126.39      |

# Supplementary Figure 1: Data flow

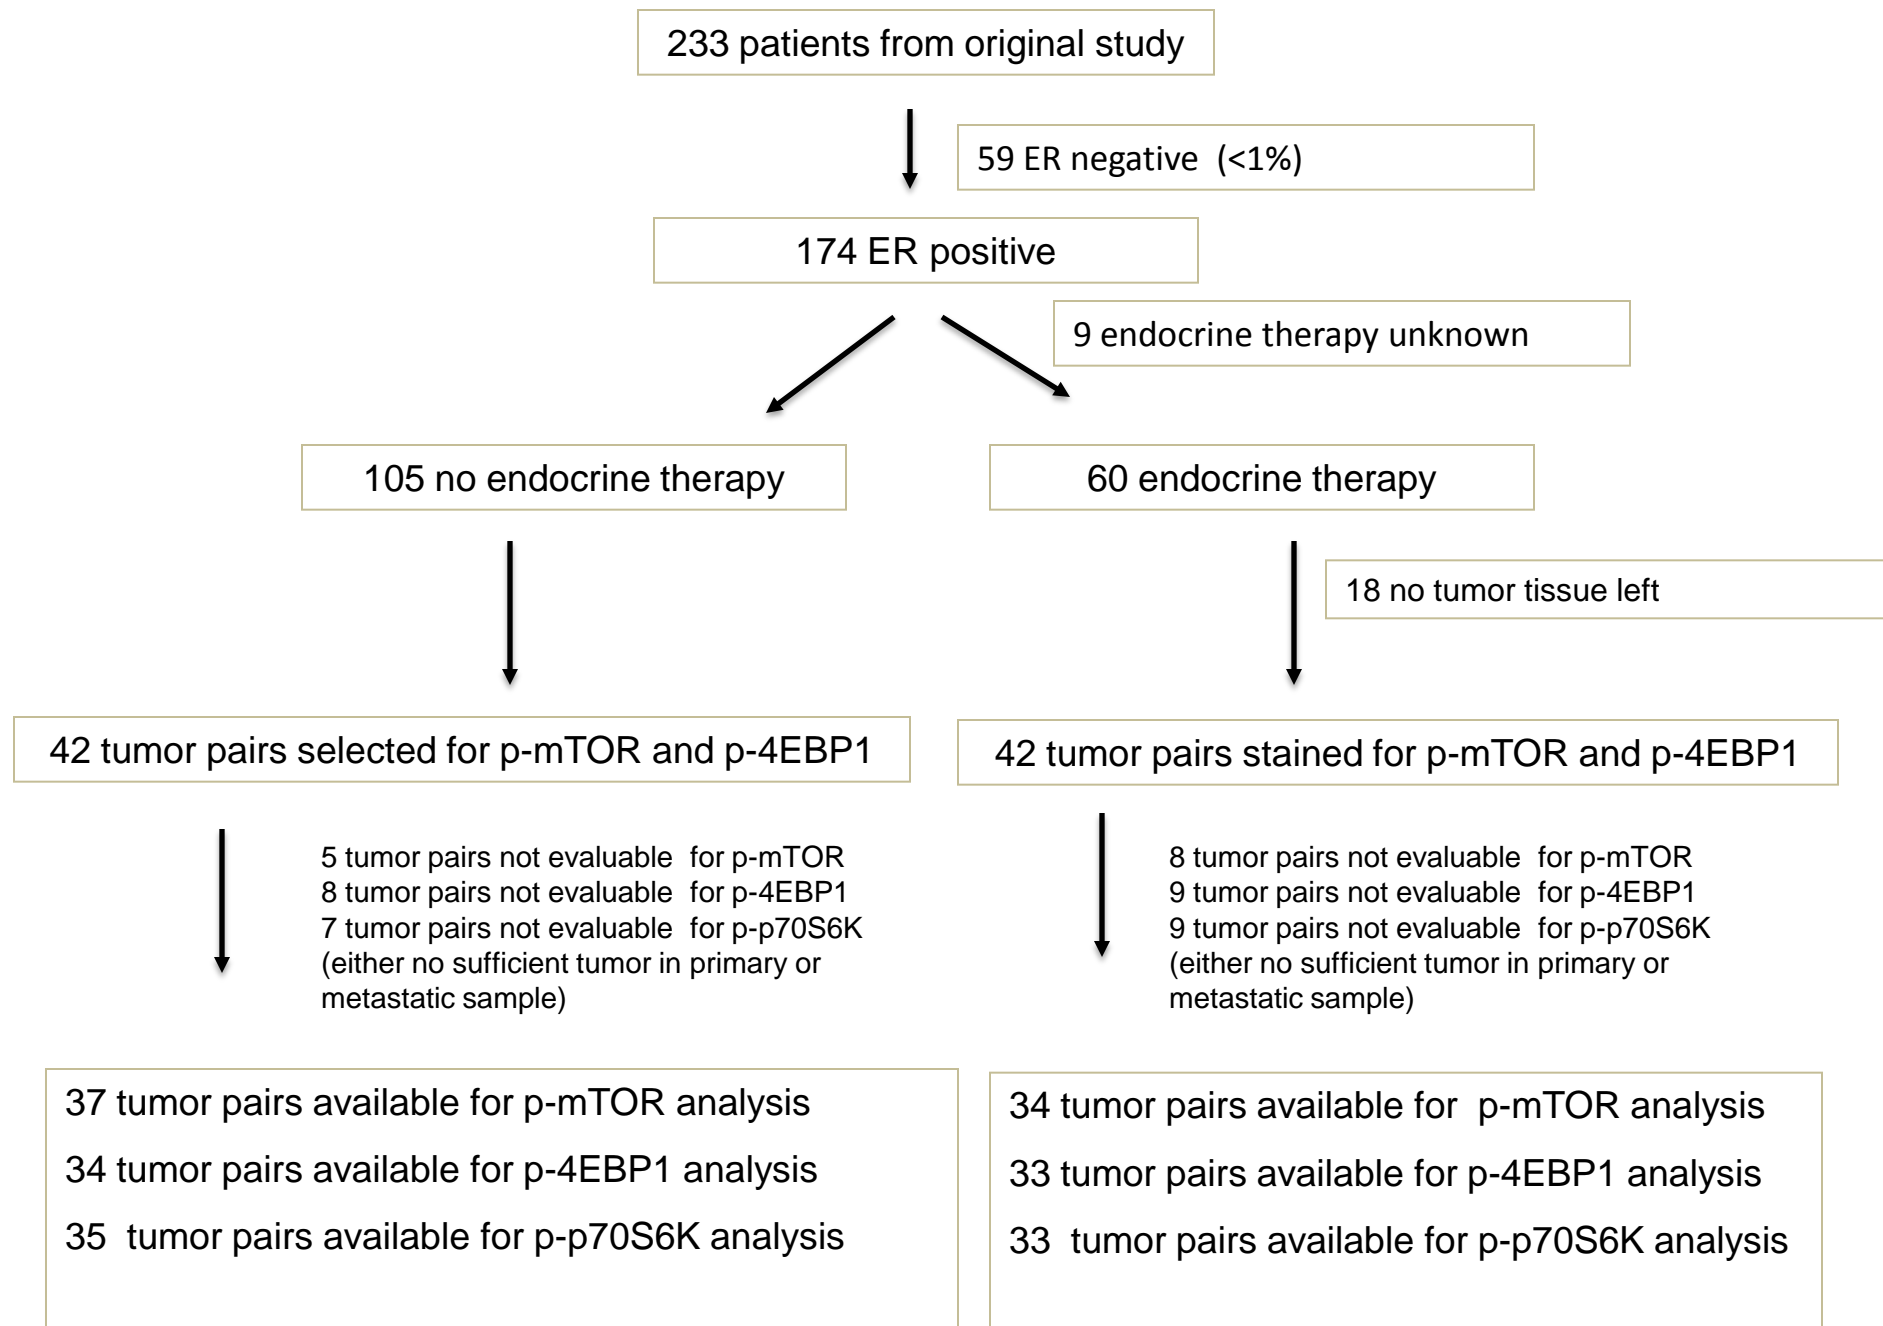

Supplement: ijc0135-1257-sd1.pdf [file ijc0135-1257-sd1.pdf]
